# Supplementary material
Source: PubMed Central journal article supplement (PMC8060950)
Supplement: mmc1.pdf [file mmc1.pdf]

T-Coffee Alignment of Selected SF1 Viral Helicases

|          |                                                                 |
|----------|-----------------------------------------------------------------|
| HepEhel  | -----R-----                                                     |
| GAVhel   | IKITTPNPSNSLTL-----WNSISPITPVLVNVRGIIQQQVSTYSIDDTG              |
| Bernehel | -----                                                           |
| PRRSVhel | -----DYASTALI-----PTCKEINMVA-----                               |
| EAVhel   | -----SHIAVPLQ-----DTLKGVVVNK-----                               |
| HCoVhel  | TKLV-FGMLFILTSHNVAPLRAPTMANQEKYSTIYKLGHPSEFNVS DAYANLV PYY----- |
| SARShel  | YKLN-VGDYFVLTSHVMPLSAPTLVPOEHYVRITGLYPTLNISDEFSSNVAN-----       |
| I        |                                                                 |
| HepEhel  | ---VTPGVVQYQFTAGVPPGSGKSRSE-----ITQA---DVDVVVVPTRELRNA---       |
| GAVhel   | SLLDKMANNITVIQGPPGTGKTYTINRFLTKINEILF---NSNIAVLASSHS AVDNIGN    |
| Bernehel | -----ENVTFVMGPPGTGKTF---VYDLYLSKA-SSSNRFVYCAPTHRLVGDMDDE        |
| PRRSVhel | ---VASNVLRSRFIIGPPGAGKTYW-----LLQQVQ---DGDVIYTPHTQTM LDMI---    |
| EAVhel   | ---ALKNAASEYVEGPPGSGKTFH-----LVKDVLAVVGSATLVVPTHASMLDCI---      |
| HCoVhel  | ---QLIGKQRITTIQGPPGSGKSHC---SIGIGVYYP---GARIVFTACSHA AVDSLCA    |
| SARShel  | ---QKVGMOKYSTLQGPPGTGKSHF---AIGLALYYP---SARIVYTACSHA AVDALCE    |
| *****    |                                                                 |
| II       |                                                                 |
| HepEhel  | -----WRRRGFAAFTPHTAAR-----VTQGRR-VVIDEA                         |
| GAVhel   | SVNPSI-FRRCKRLIPEESEKVRTRFRQYTTGGGII FATLQSTRGILCPSVEY-MIIDEF   |
| Bernehel | KVDGAVVVSAY-----NDRTYRNPVWNKDDSYGVL LCTHNT---LPFIKSAV-LIADEV    |
| PRRSVhel | RALGTC-----RFNVPAGTTLQFPVPSRTGPWVRILAG-----GWCPGKN-SFLDEA       |
| EAVhel   | NKLRQAGADF-YFVVPKYTVLDFPRPGSGNITVRLPQV-----GTSEGE-TFVDEV        |
| HCoVhel  | KAVTAYSVDKCTRIIPARARVECYSGFKPNNSAQYVFTVNA---LPEVNADI-VVVDEV     |
| SARShel  | KALKYLPIDKCSRIIPARARVECFDKFKVNSTLEQYVFTVNA---LPETTADI-VVFDEI    |
| *****    |                                                                 |
| III      |                                                                 |
| HepEhel  | PSLPPHLLLHMQR---AATVHLLGDPNQIP AIDFEH---AGLVPAIRPD-----         |
| GAVhel   | SMATD-IQIYSAICHLNPRHII FTGDPCQL-----STQH VYNTDVYHSNIINN---HQ    |
| Bernehel | SLIPPH-VMIKILS-MGFKKVLLGDPFQLSPVYKNHK-----VHFKYDTF---YL         |
| PRRSVhel | AYCNH-LDVLRLLS---KTTLTCLGDFKQLHPVGFDS---HCYVFDIMPQ-----         |
| EAVhel   | AYFSP-VDLARILT---QGRVKGYGDLNLQGC VGPASVPRNLWLRHFVSL-----        |
| HCoVhel  | SMCTN-YDLSVINQRISYKHIVYVGDPOQL-----PAPRVLISKGVMEPIDVNVVTQR      |
| SARShel  | SMATN-YDLSVVNARLRKHYVYIGDPAQL-----PAPRTLLTKGTLEPEYFN SVCRLE     |
| *****    |                                                                 |
| HepEhel  | ---LAPTSWWHVTHRCPADVCELIRGAY-PMIQ-----                          |
| GAVhel   | LTGKFPTEFLDITYRMGSKINDFISENFYDGLKTAATYEGEVFQLHLDPINMLSQIHAIW    |
| Bernehel | LQLATQKRYLTACYRCPPQILSAFASKPYCDVGVDLV SFNNKP-----GKFDIT-VSKQL   |
| PRRSVhel | -----TQLKTIWRFGQNICDAIQDYRDKLM-----                             |
| EAVhel   | -----EPLRVCHRFGAAVCDLIKGIY-PYYE-----                            |
| HCoVhel  | MCAIGPDVFLHKCYRCPAEIVNTVSELVYENKFPVPVKEASKQCFKIFERGSVQVD-NGSSI  |
| SARShel  | MKTIGPDMFLGTCRRCPAEIVDVTVSALVYDNK LKAHKDKSAQCFKMFYKGVITHI-VSSAI |
| *****    |                                                                 |
| V        |                                                                 |
| HepEhel  | --TTSRVLRSFLWGEPAVGQKLVFTQA AKA-----NPGS---VTVHEAQQATY TET-     |
| GAVhel   | ESSAQN-----NFAILVTHHEAFS IIRQYFTDIDIQIP IYTVHTSQGRTFDRGIV       |
| Bernehel | ANIQDFSVLSVLSKE--YPGYVILVNYRAADVAMQN-GLGD---VTTIDSSQGTAA NHLL   |
| PRRSVhel | --SMVNTTRVTYVEKF-VRYGQVLTTPYHRDR-----EDDA---ITIDSSQGATF DVV-    |
| EAVhel   | --PAPHTTKVVFVNPDPFEKGVVITAYHKDR-----GLGH---RTIDSIQGC TF PVV-    |
| HCoVhel  | NRRLQDVVKRFIHKNSTWSKAVFISPYNSQNYVAARLLGLQT---QTVDSAQGS EYDYVIF  |
| SARShel  | NRPIQGVVREFLTRNPAWRKAVFISPYNSQNAVASKILGLPT---QTVDSSQGS EYDYVIF  |
| *****    |                                                                 |
| VI       |                                                                 |
| HepEhel  | TTIATADARGLIQSSRAHAIVALTRHTEKCVIIDA-----PGLLR----               |
| GAVhel   | VSYRNTAF-----TRDPNIVNVAVSFRFQCICMHQC-----NPYYSKLPY---           |
| Bernehel | VLFGASNF-----SKTVNRVIVGCSRSTHLLVVVCCPELFGKHFQPIILNWPEP          |
| PRRSVhel | TLHLPTKD---SLNRQALVAITRARHAI FVYDPH---RQLQGLFDLPAK              |
| EAVhel   | TLRLPTPQ---SLTRPRAVAVTRASQELYIYDPF---DQLSGLLKF TKE              |
| HCoVhel  | AQTSDTAH---ACNANRFNVAITRAKKGIFCIMS D---RTLFDALKFFEI             |
| SARShel  | TQTTETAH---SCNVNRFNVAITRAKIGILCIMS D---RDLYDKLQFTSL             |
| *****    |                                                                 |

Relative degree of conservation BAD AVG GOOD

The major conserved helicase motifs [Kadare, G., and Haenni, A. L. (1997) *J Virol* **71**, 2583-2590; Gorbalenya, A. E., and Koonin, E. V. (1993) *Curr. Opin. Struct. Biol* **3**, 419-429] are indicated with Roman numerals and are underlined with asterisks.

Sequences were aligned using T-Coffee [Notredame, C., Higgins, D., Heringa, J. (2000) *J. Mol. Biol.* **302**, 205-217. <http://www.ch.embnet.org/software/TCoffee.html>] and were manually cropped for clarity.

**HepEhel** = Hepatitis E virus, Orf1 helicase domain (NP\_056785.1); **GAVhel** = Gill-associated virus, Orflab replicase (locus AF227196.1); **Bernehel** = Berne virus, Orflb helicase domain (locus P18458); **PRRSVhel** = Porcine reproductive and respiratory syndrome virus, Orflab nsP10 helicase domain (NP\_066135.1); **EAVhel** = Equine arteritis virus, Orflab nsP10 helicase domain (NP\_705591); **HCoVhel** = Human coronavirus 229E, Orflab nsP10 helicase domain (NP\_073549.1); **SARSCoV** = SARS coronavirus, Orflab nsP10 helicase domain (NP\_828849.2)
